# Supplementary material for: Inflammatory biomarkers are associated with aetiology and predict outcomes in community-acquired pneumonia: results of a 5-year follow-up cohort study
Source: PubMed Central journal article supplement — ERJ Open Res. 2019 Mar 11;5(1):00014-2019. doi: 10.1183/23120541.00014-2019 (PMC6409082; doi:10.1183/23120541.00014-2019), 2019-03-11
Supplement: 00014-2019.Supplement.pdf [file 00014-2019.Supplement.pdf]

## Supplementary Material

**Figure S1** Flow chart of the inclusion process of the study population

Abbreviations: CRF, case record file; ID, identification.

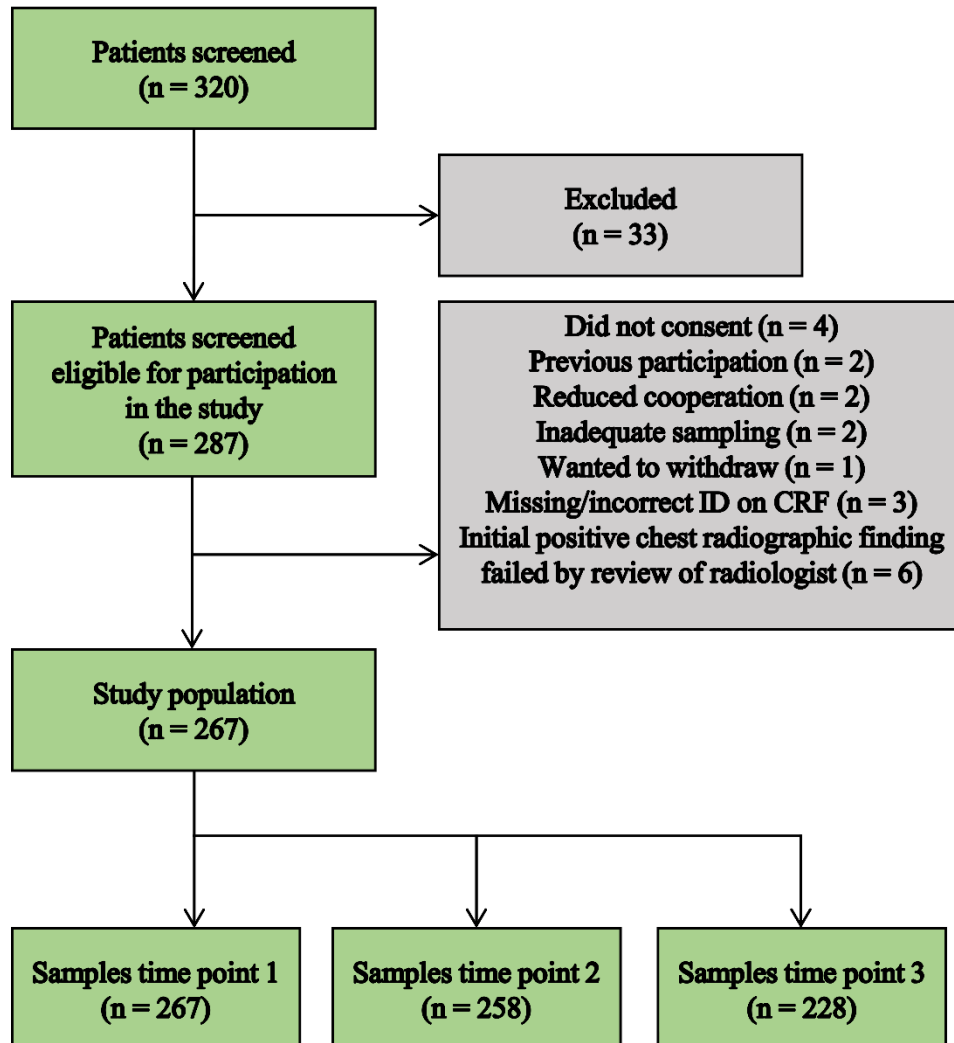

**Table S1 Baseline characteristics of 267 hospitalized patients with community-acquired pneumonia**

| <b>Characteristics</b>               | <b>Patients</b>   | <b>Missing data</b> |
|--------------------------------------|-------------------|---------------------|
| <b>Demographics</b>                  |                   |                     |
| Age, (years)                         | 66 (52-78)        |                     |
| Male gender, n (%)                   | 140 (52.4)        |                     |
| Active smoker, n (%)                 | 65 (24.4)         | 1                   |
| Nursing home resident, n (%)         | 4 (1.5)           |                     |
| <b>Comorbid conditions, n (%)</b>    | <b>172 (64.4)</b> |                     |
| Cardiovascular disease <sup>a</sup>  | 74 (27.7)         |                     |
| COPD                                 | 60 (22.5)         |                     |
| Immunocompromised <sup>b</sup>       | 48 (18.0)         |                     |
| Autoimmune disease <sup>c</sup>      | 34 (12.7)         |                     |
| Diabetes mellitus                    | 33 (12.4)         |                     |
| Renal disease                        | 32 (12.0)         |                     |
| Neurological disease <sup>d</sup>    | 19 (7.1)          |                     |
| Dementia                             | 15 (5.6)          |                     |
| Liver disease                        | 4 (1.5)           |                     |
| <b>Vaccination status, n (%)</b>     |                   |                     |
| Influenza vaccination (<1 year)      | 66 (33.3)         | 69                  |
| Pneumococcal vaccination (<10 years) | 25 (12.5)         | 68                  |
| <b>Severity of illness, n (%)</b>    |                   |                     |
| CURB-65 $\geq 3$                     | 97 (37.9)         | 11                  |
| ICU admission                        | 48 (18.0)         |                     |
| <b>Etiology, n (%)</b>               |                   |                     |

|                 |            |
|-----------------|------------|
| Bacterial       | 75 (28.1)  |
| Viral           | 41 (15.4)  |
| Viral-bacterial | 51 (19.1)  |
| Unknown         | 100 (37.5) |

---

Data are presented as medians (25th - 75th percentile) or No. (%). Abbreviations: COPD, chronic obstructive pulmonary disease; CURB-65, Confusion, Urea, Respiratory rate, Blood pressure, Age $\geq$ 65; ICU, intensive care unit.

<sup>a</sup>Heart failure, coronary heart disease, cerebrovascular disease and/or peripheral artery disease.

<sup>b</sup>Primary or secondary immunodeficiency, active malignancy, immunosuppressive drugs.

<sup>c</sup>Rheumatoid arthritis, systemic lupus erythematosus, inflammatory bowel disease, autoimmune hepatitis, Sjogren's disease, psoriasis.

<sup>d</sup>Central nervous disease, neuromuscular disease.

**Table S2 Biomarker levels at hospital admission in 267 hospitalized patients with community-acquired pneumonia, stratified by short-term outcome**

| <b>Biomarker</b>         | <b>Adverse outcome<br/>(n = 215)</b> | <b>Non-adverse outcome<br/>(n = 51)</b> | <b><i>p-value</i></b> |
|--------------------------|--------------------------------------|-----------------------------------------|-----------------------|
| WBC (10 <sup>9</sup> /L) | 12.2 (9.6-16.9)                      | 12.2 (9.1-16.4)                         | 0.792                 |
| CRP (mg/L)               | 249 (161-313)                        | 213 (143-284)                           | 0.072                 |
| PCT (ng/mL)              | 2.98 (0.52-6.79)                     | 0.56 (0.20-3.33)                        | 0.001                 |
| Calprotectin (ug/L)      | 3804 (2329-5776)                     | 4125 (2855-5259)                        | 0.754                 |
| PTX3 (ng/mL)             | 7.47 (4.41-10.69)                    | 4.23 (2.31-7.42)                        | <0.001                |
| Presepsin (ng/mL)        | 132.2 (36.3-345.3)                   | 42.1 (20.0-136.9)                       | 0.002                 |

Data presented as medians (25th-75th percentile). Missing data on outcome in 1 patient.

Comparison performed with Mann-Whitney U test. Abbreviations: CRP, C-reactive protein, PCT, procalcitonin, PTX3, pentraxin 3, WBC, white blood cells
